# Supplementary material
Source: Springer Nature journal article supplement (https://www.springermedizin.de/resource/supplementary/12931_2010_1589_MOESM1_ESM.PDF/10243328)

# Additional File 1, Figure S1

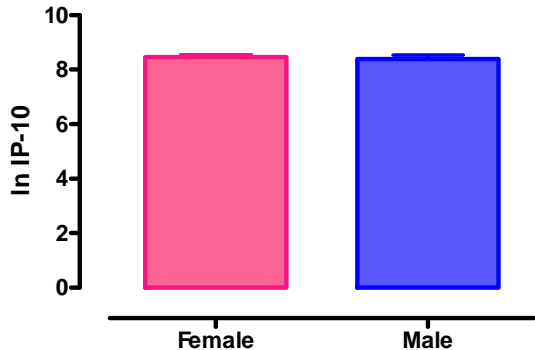

Supplement: MOESM1 [file 10243328]
